# Supplementary material
Source: PubMed Central journal article supplement (PMC5327791)
Supplement: NIHMS842922-supplement-2.pdf [file NIHMS842922-supplement-2.pdf]

## **Supplemental Information**

### **Germ cell-less promotes centrosome segregation to induce germ cell formation**

Dorothy A. Leric, Conrad W. Shebelut, Kristen J. Lawlor, Nasser M. Rusan, Elizabeth R. Gavis, Paul Schedl, and Girish Deshpande
